6121

# Phrenic nerve injury during pulmonary vein isolation using the second-generation cryoballoon: characteristics and follow-up - The YETI registry

C.H. Heeger<sup>1</sup>, A. Pott<sup>2</sup>, C. Sohns<sup>3</sup>, A. Rillig<sup>4</sup>, M. Kuniss<sup>5</sup>, S. Cay<sup>6</sup>, S. Miyazaki<sup>7</sup>, A. Aryana<sup>8</sup>, E. Jedrzejczyk-Patej<sup>9</sup>, K. Aytemir<sup>10</sup>, O. Inaba<sup>11</sup>, J.K.R. Chun<sup>12</sup>, P. Sommer<sup>3</sup>, T. Dahme<sup>2</sup>, R.R. Tilz<sup>1</sup>

<sup>1</sup>University of Luebeck, Medical clinic II, Luebeck, Germany; <sup>2</sup>University of Ulm, Cardiology, Ulm, Germany; <sup>3</sup>Heart and Diabetes Center NRW, Bad Oeynhausen, Germany; <sup>4</sup>Asklepios Clinic St. Georg, Department of Cardiology, Hamburg, Germany; <sup>5</sup>Kerckhoff Heart and Thorax Center, Bad Nauheim, Germany; <sup>6</sup>Ankara Education and Research Hospital, Yuksek Ihtisas Heart-Education and Research Hospital, Ankara, Turkey; <sup>7</sup>Tsuchiura Kyodo Hospital, Tsuchiura, Japan; <sup>8</sup>Mercy Heart Institute, Sacramento, United States of America; <sup>9</sup>Department of Cardiology, Congenital Heart Diseases and Electrotherapy, Zabrze, Poland; <sup>10</sup>Hacettepe University, Ankara, Turkey; <sup>11</sup>Red Cross Hospital, Saitama, Japan; <sup>12</sup>CardioVascular Center Bethanien (CCB), Frankfurt am Main, Germany

**Background:** Second-generation cryoballoon (CB2) based pulmonary vein isolation (PVI) has emerged as a safe and effective treatment option for symptomatic atrial fibrillation (AF). Although published complication rates of CB2 based-PVI are relatively low and several safety algorithms have been implemented in the protocols the most frequent complication is right-sided phrenic nerve injury (PNI). The reported incidence of PNI varies from 2–5% of patients. However data on PNI characteristics as well as follow-up is sparse.

**Purpose:** We aimed to evaluate the incidence, characteristics and outcome of PNI during after CB2 based-PVI in a large patients population.

**Methods and results:** From July 2012 to November 2018 a total of 13693 patients received CB2 or CB3 (third-generation) based-PVI in 23 EP centers (Germany: 12, China: 1, Turkey: 3, Japan: 3, USA: 1, Austria: 1, Poland: 1, Switzerland: 1). A total of 596 (4.4%) of patients experienced PNI during treatment of the right superior (84%) right inferior (15%) right middle (0.3%) (and left superior (0.3%) pulmonary veins. The mean time to PNI was 127±51 seconds and the mean temperature at the time of PNI was -49±7 °C. The target PV was isolated at time of PNI in 84% of cases.

The applications were interrupted using double-stop technique in (71%). In 212/306 (52%) a CMAP was utilized.

At the end of the procedure PNI persistent in 45% of patients. Fluoroscopic or sonographic evaluation of PNI was performed 1–3 days after the procedure and revealed persistent PNI in 35% of patients. Dyspnea before discharge was reported in 18% of patients with persistent PNI. Patients follow up at 1–3, and 6–12 months included fluoroscopy and a visit in an outpatient clinic. After 1–3 months 18% of patients showed persistent PNI including 13% of patients complaining of dyspnea. After 6–12 months of follow-up including fluoroscopic evaluation PNI was persistent in 1.8% of patients while dyspnea was reported by 1.7% patients. Only 0.08% of the overall population of 13693 patients showed permanent and symptomatic PNI.

**Conclusion:** The incidence of PNI during CB2-based PVI is low. About 55% of PNI recovered until the end of the procedure. Most of PNI recovered within 12 months. Symptomatic permanent PNI is very rare in patients after CB2/CB3-based PVI.
